# Supplementary material for: Effects of Chinese medicinal herbs on expression of brain-derived Neurotrophic factor (BDNF) and its interaction with human breast cancer MDA-MB-231 cells and endothelial HUVECs
Source: Springer Nature journal article supplement (doi:10.1186/s12906-017-1909-7), 2017-08-12

# S. miltiorrhiza -Tanshinone II A (HPLC)

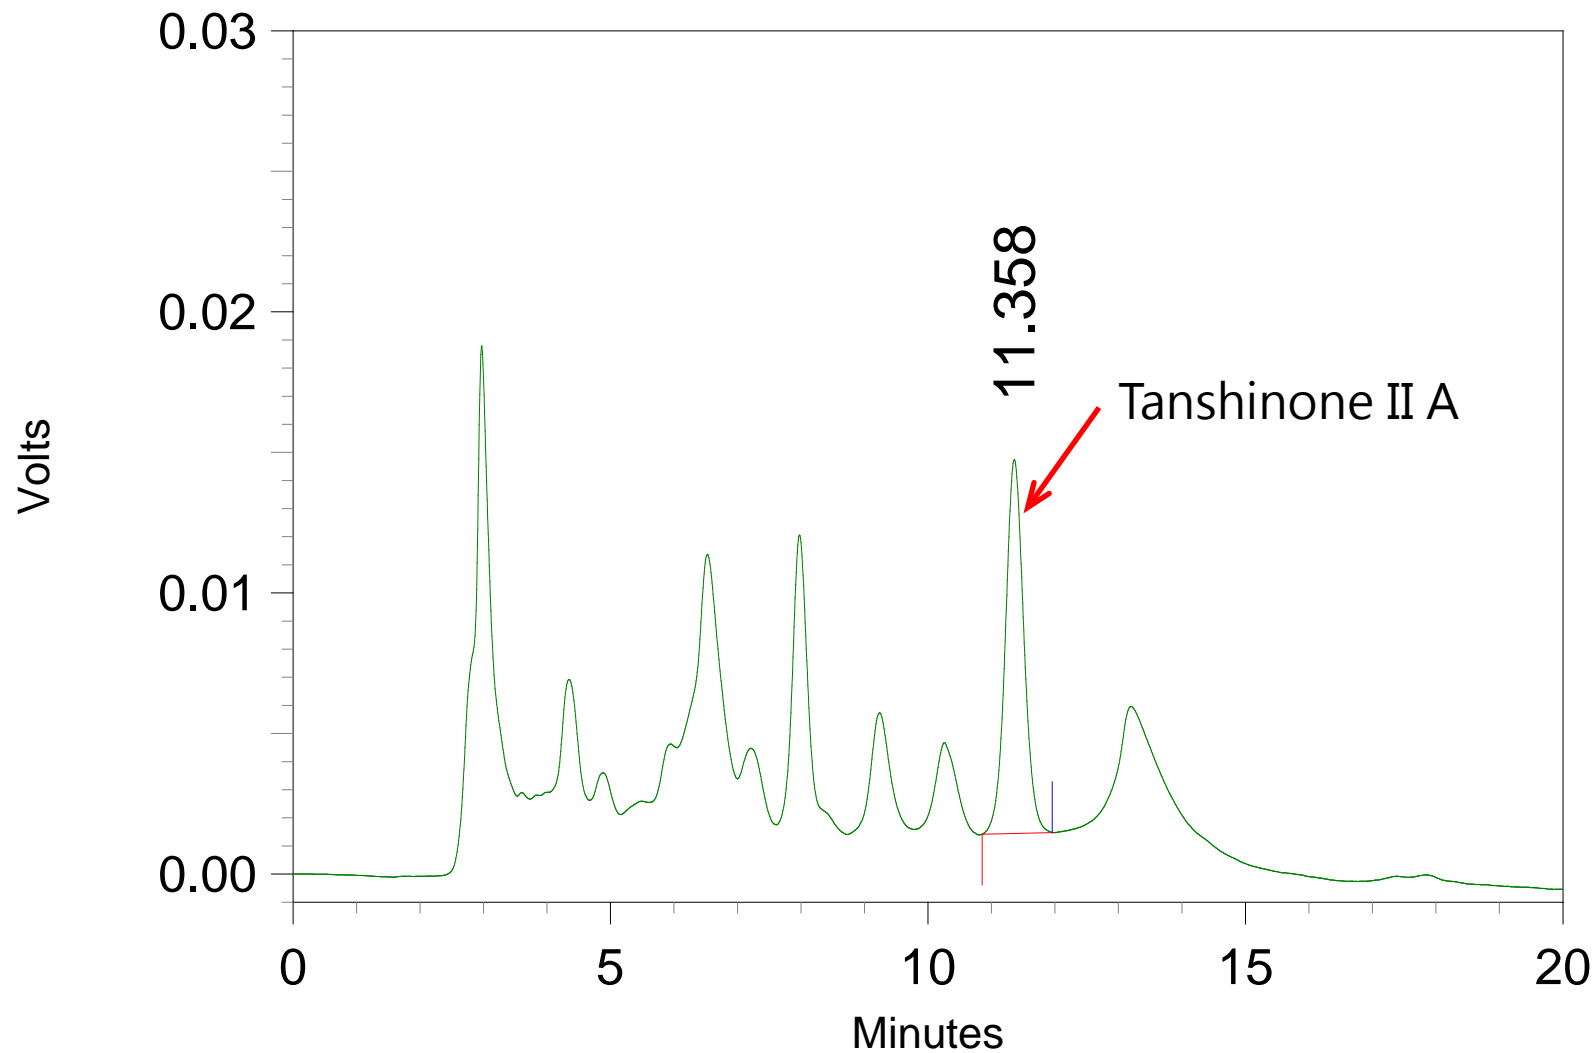

# *S. baicalensis* - Baicalin (HPLC)

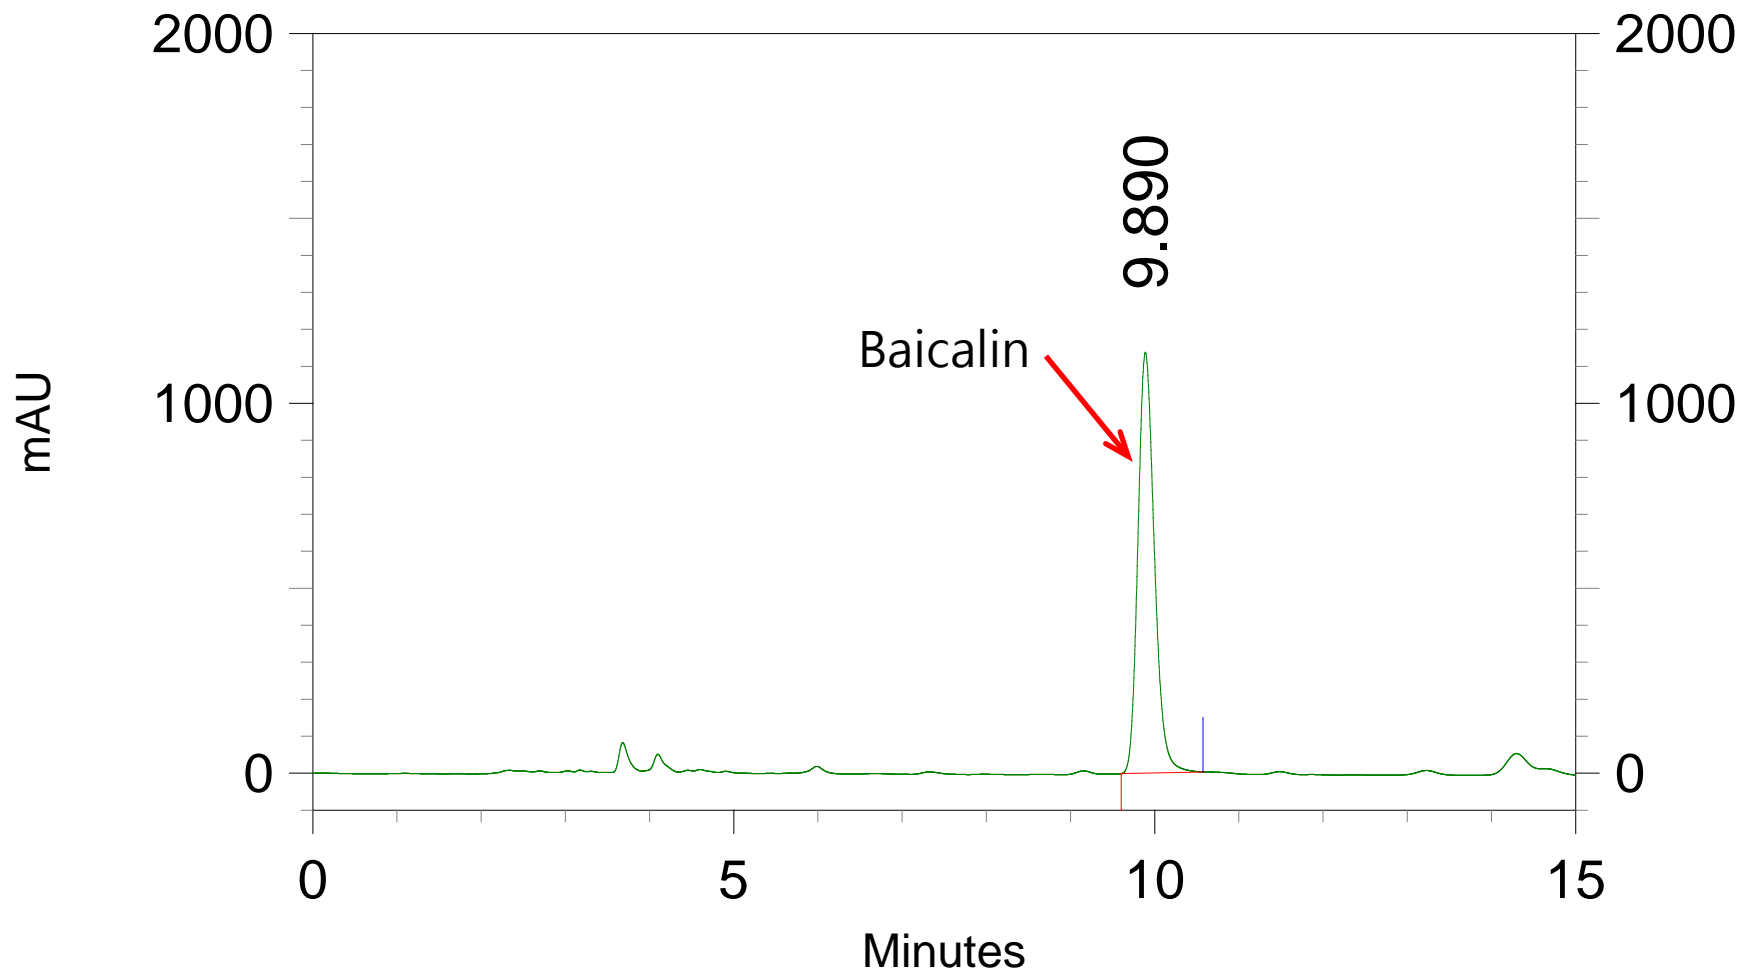

# P. lactiflora -Paeoniflorin (HPLC)

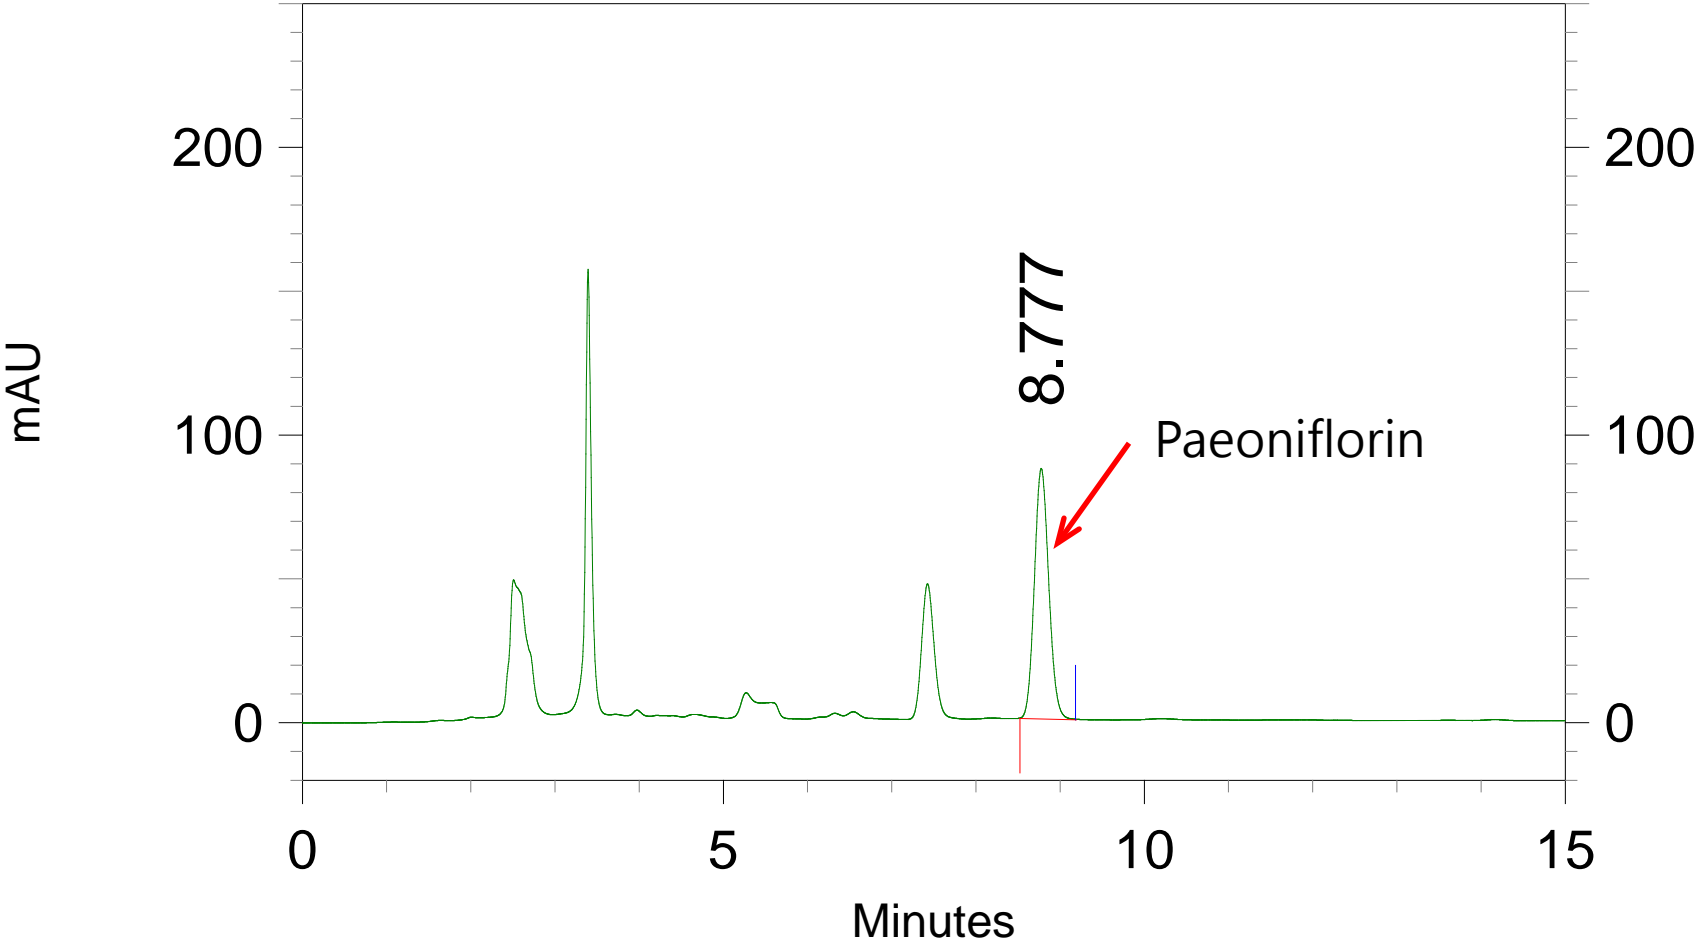

# *P. suffruticosa* - Paeoniflorin (HPLC)

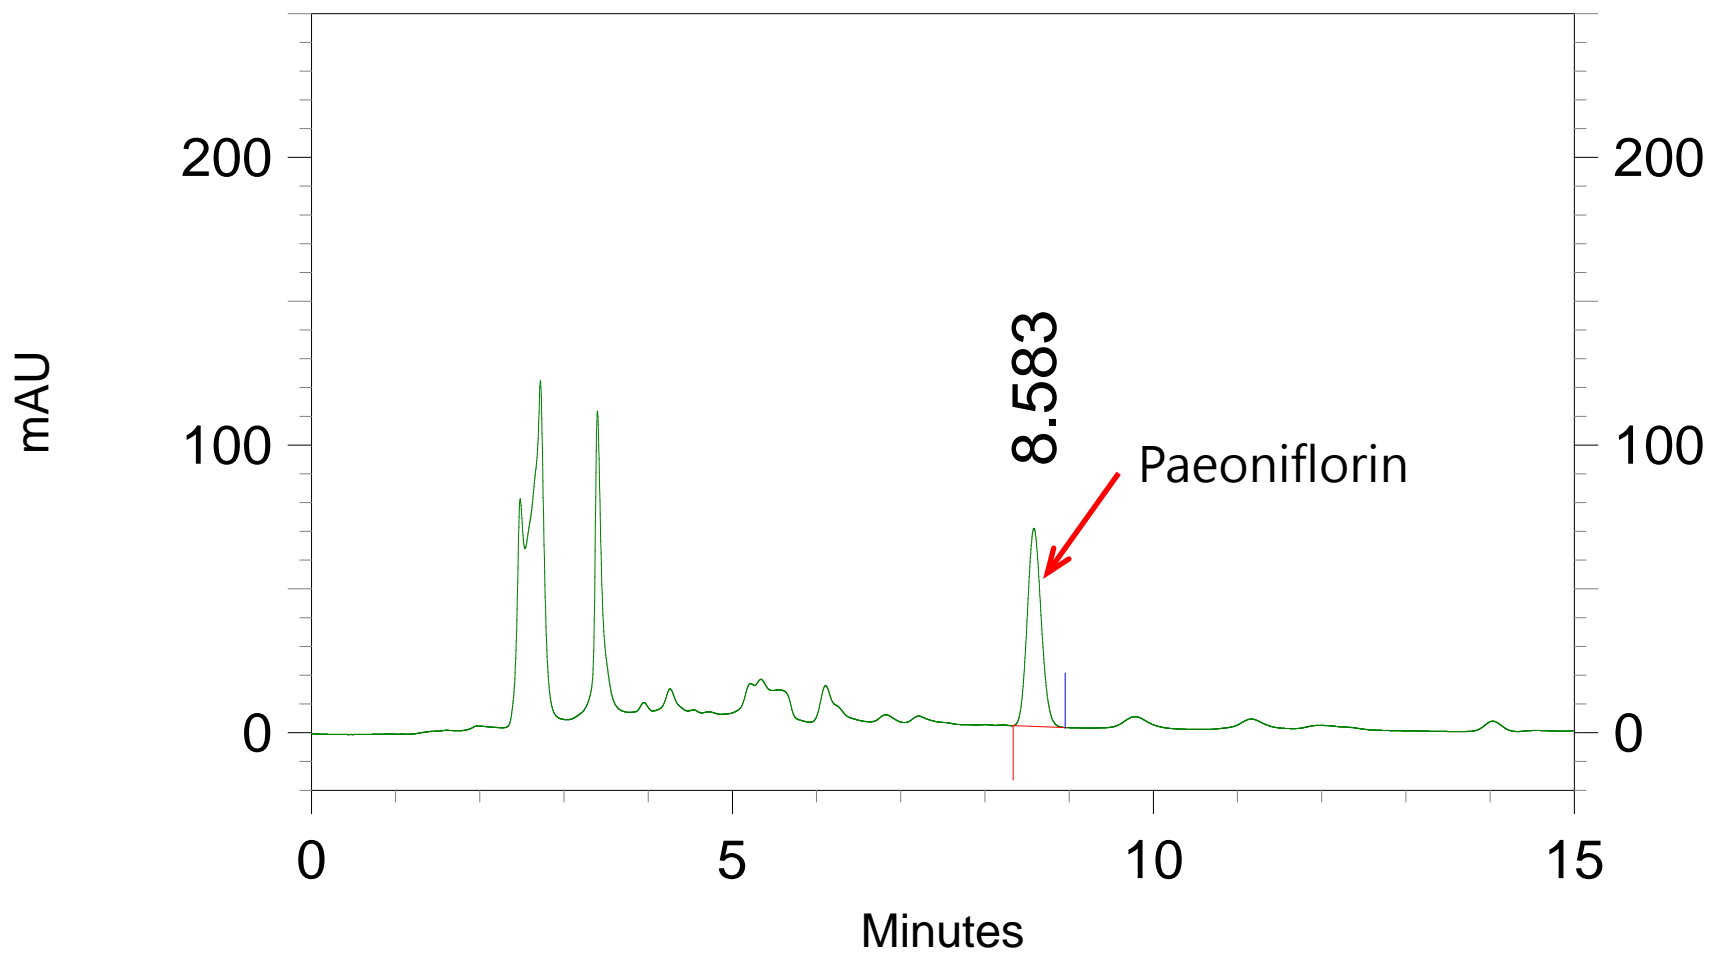

# *P. suffruticosa* -Paeonol (HPLC)

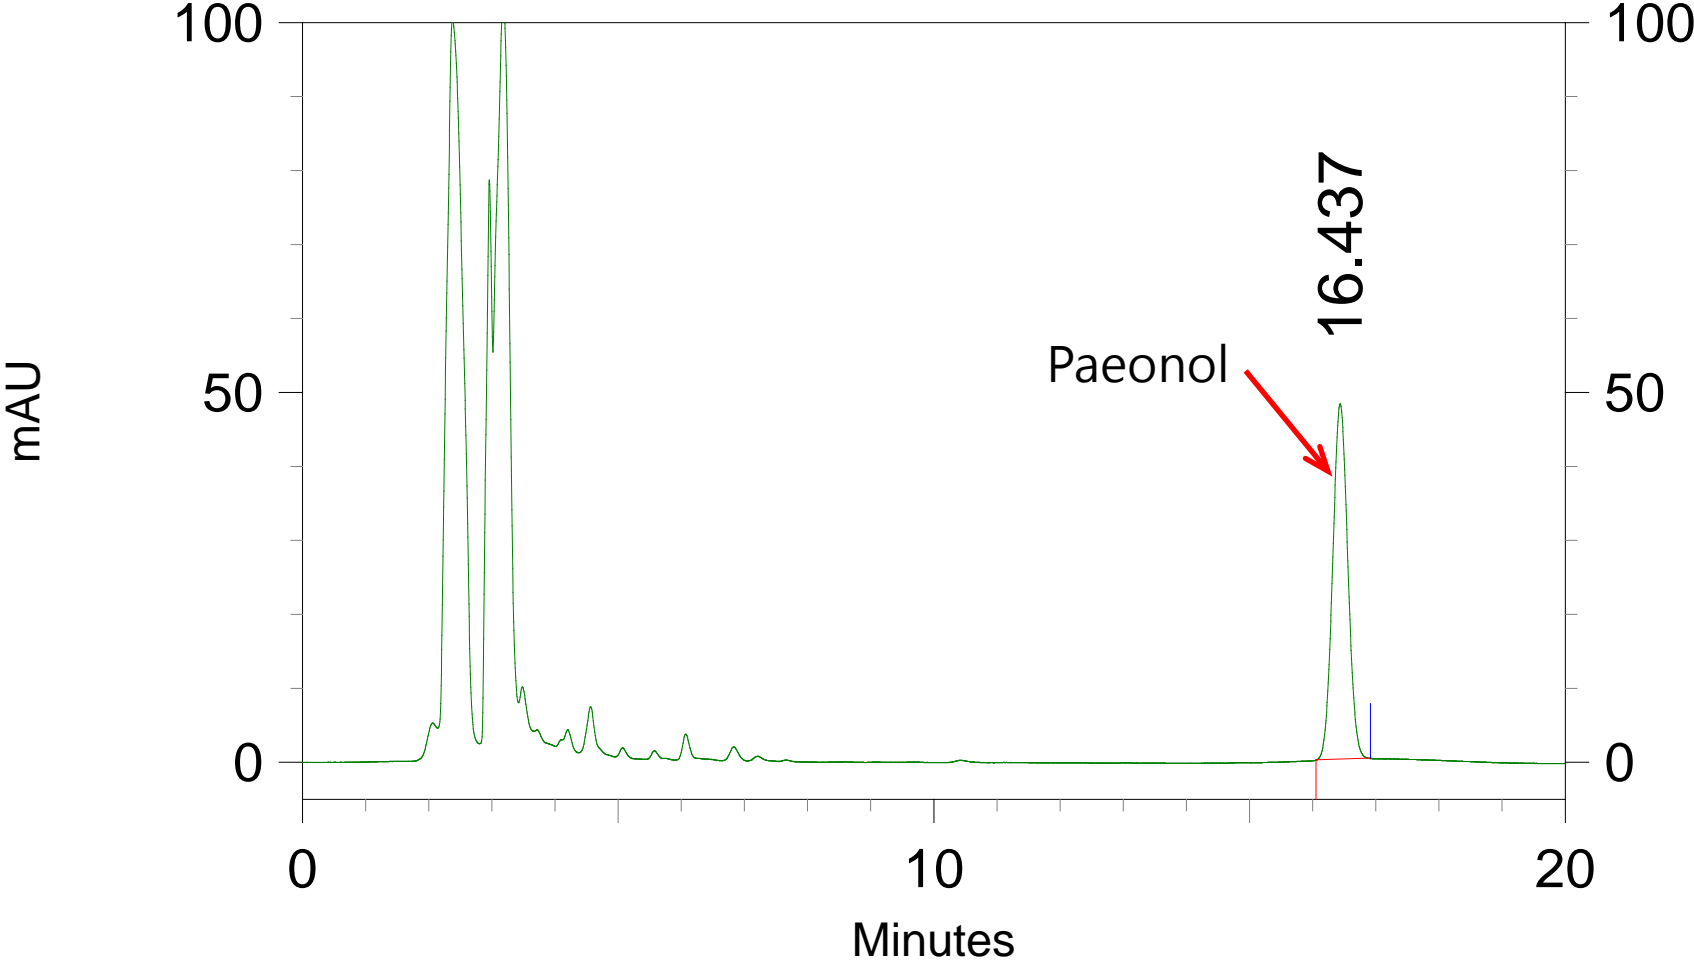

# L. chuanxiong - Ferulic acid (HPLC)

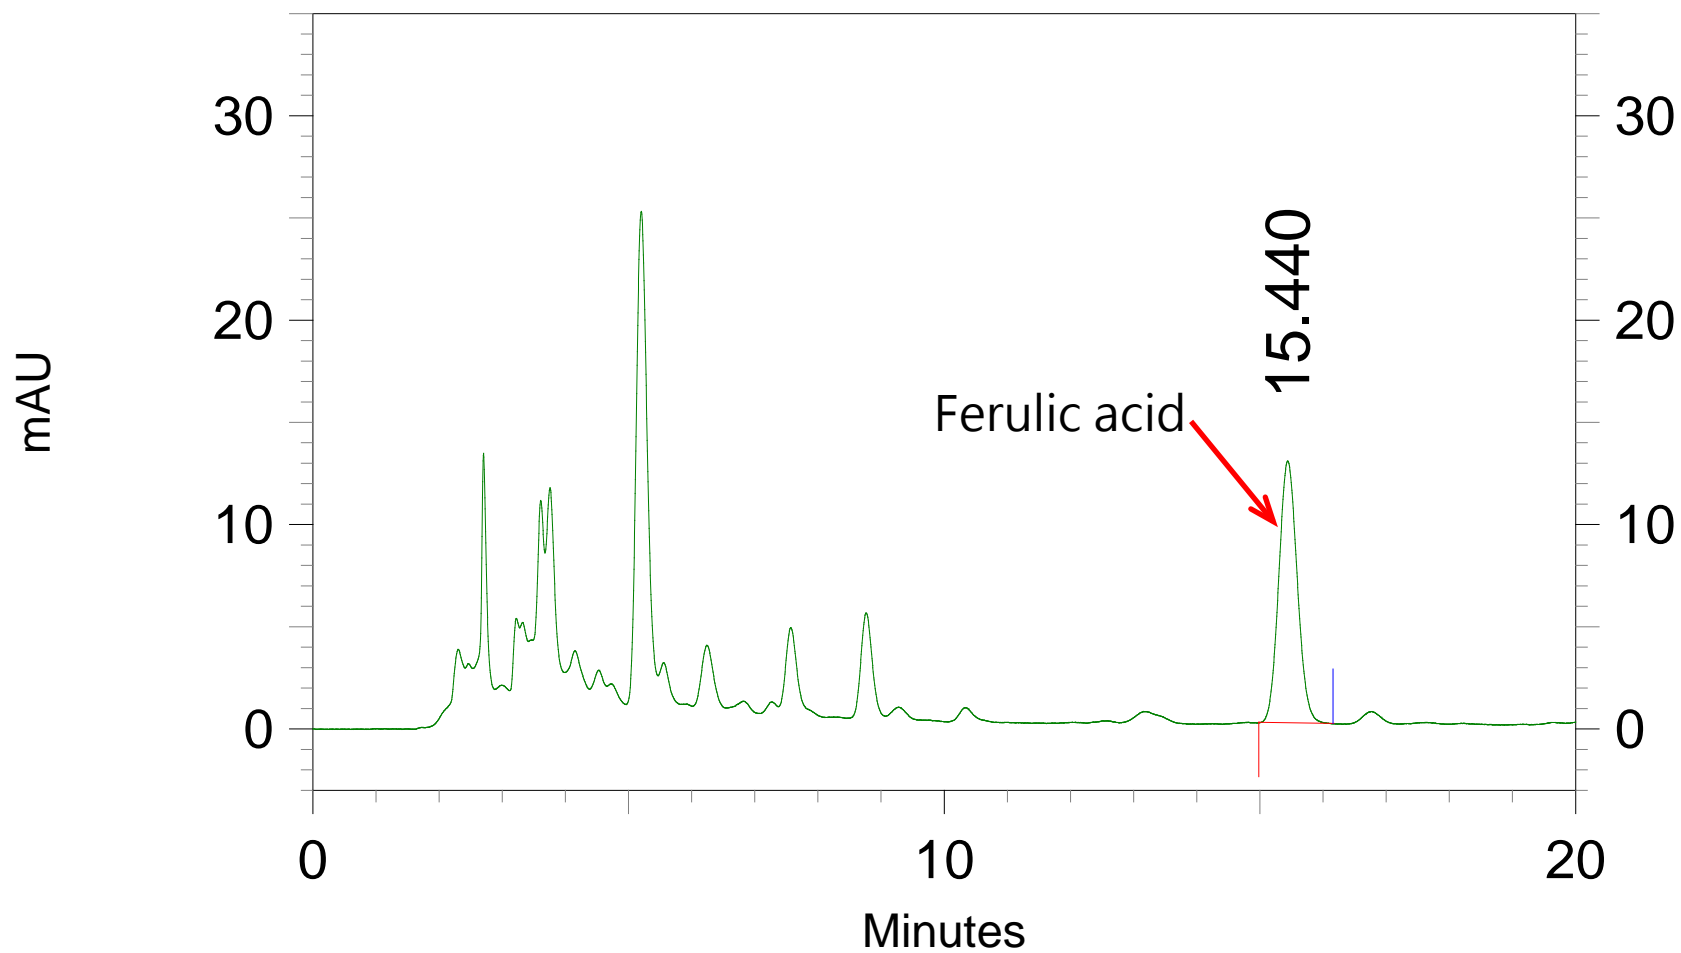

# A. rhizoma -Mangiferin (HPLC)

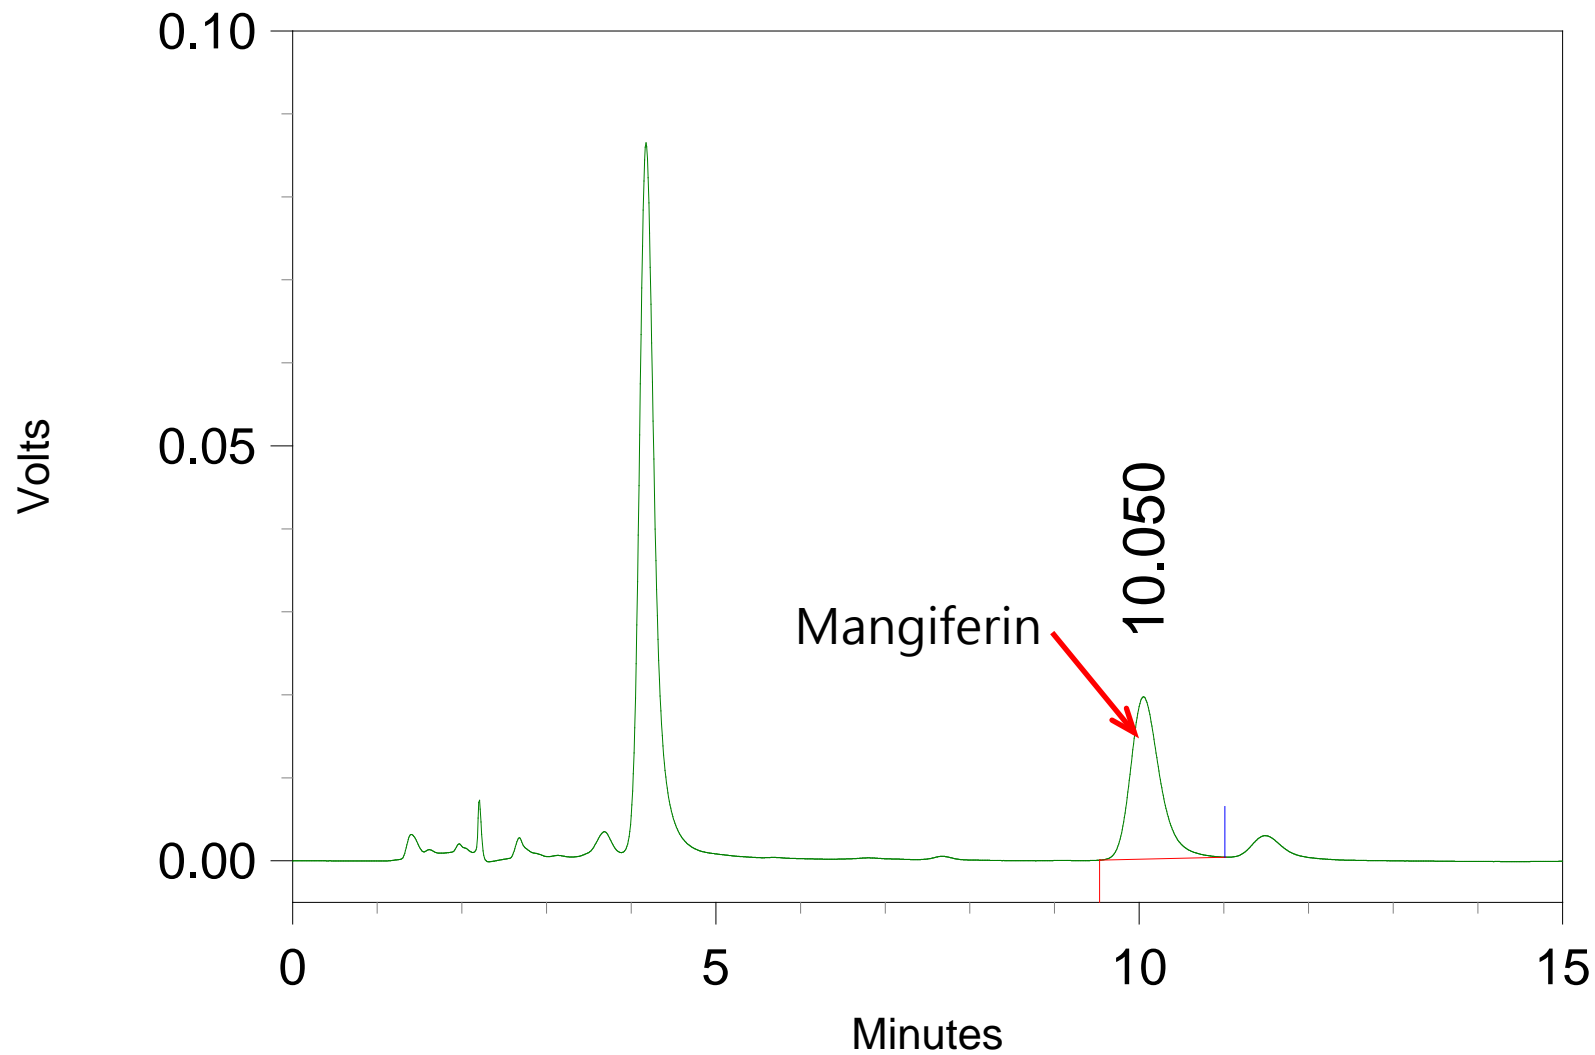

# A. rhizoma - Timosaponin B II (HPLC-ELSD)

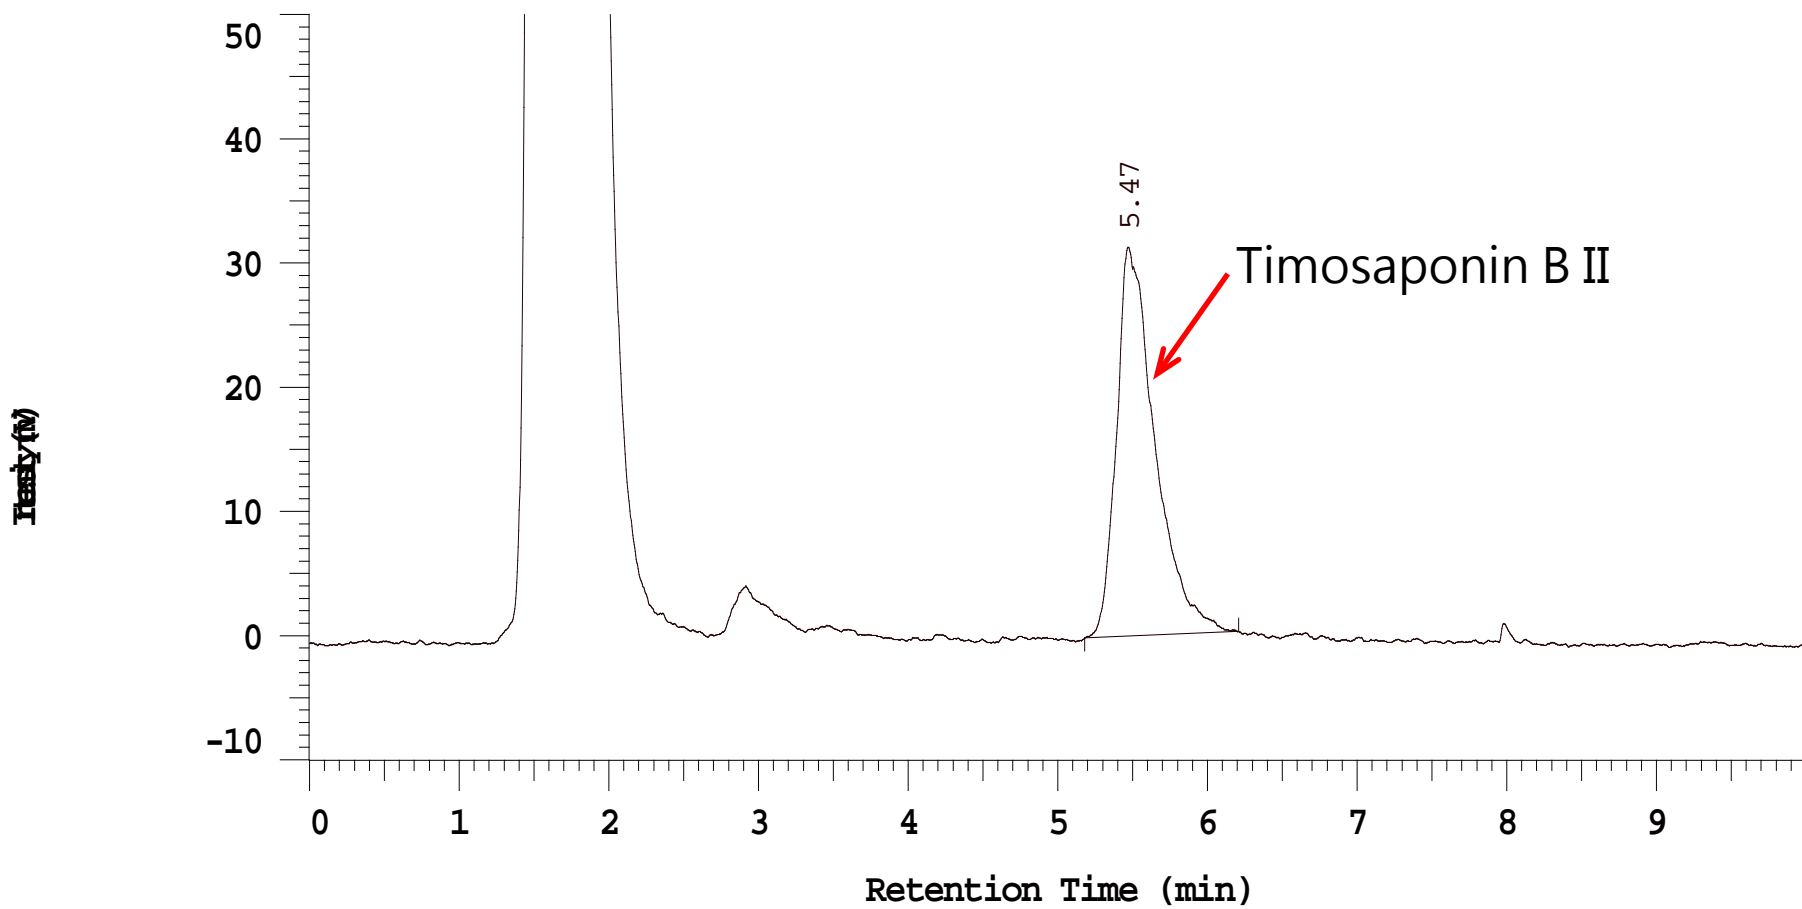



# A. membranaceus - Astragaloside IV (LC-MS/MS)

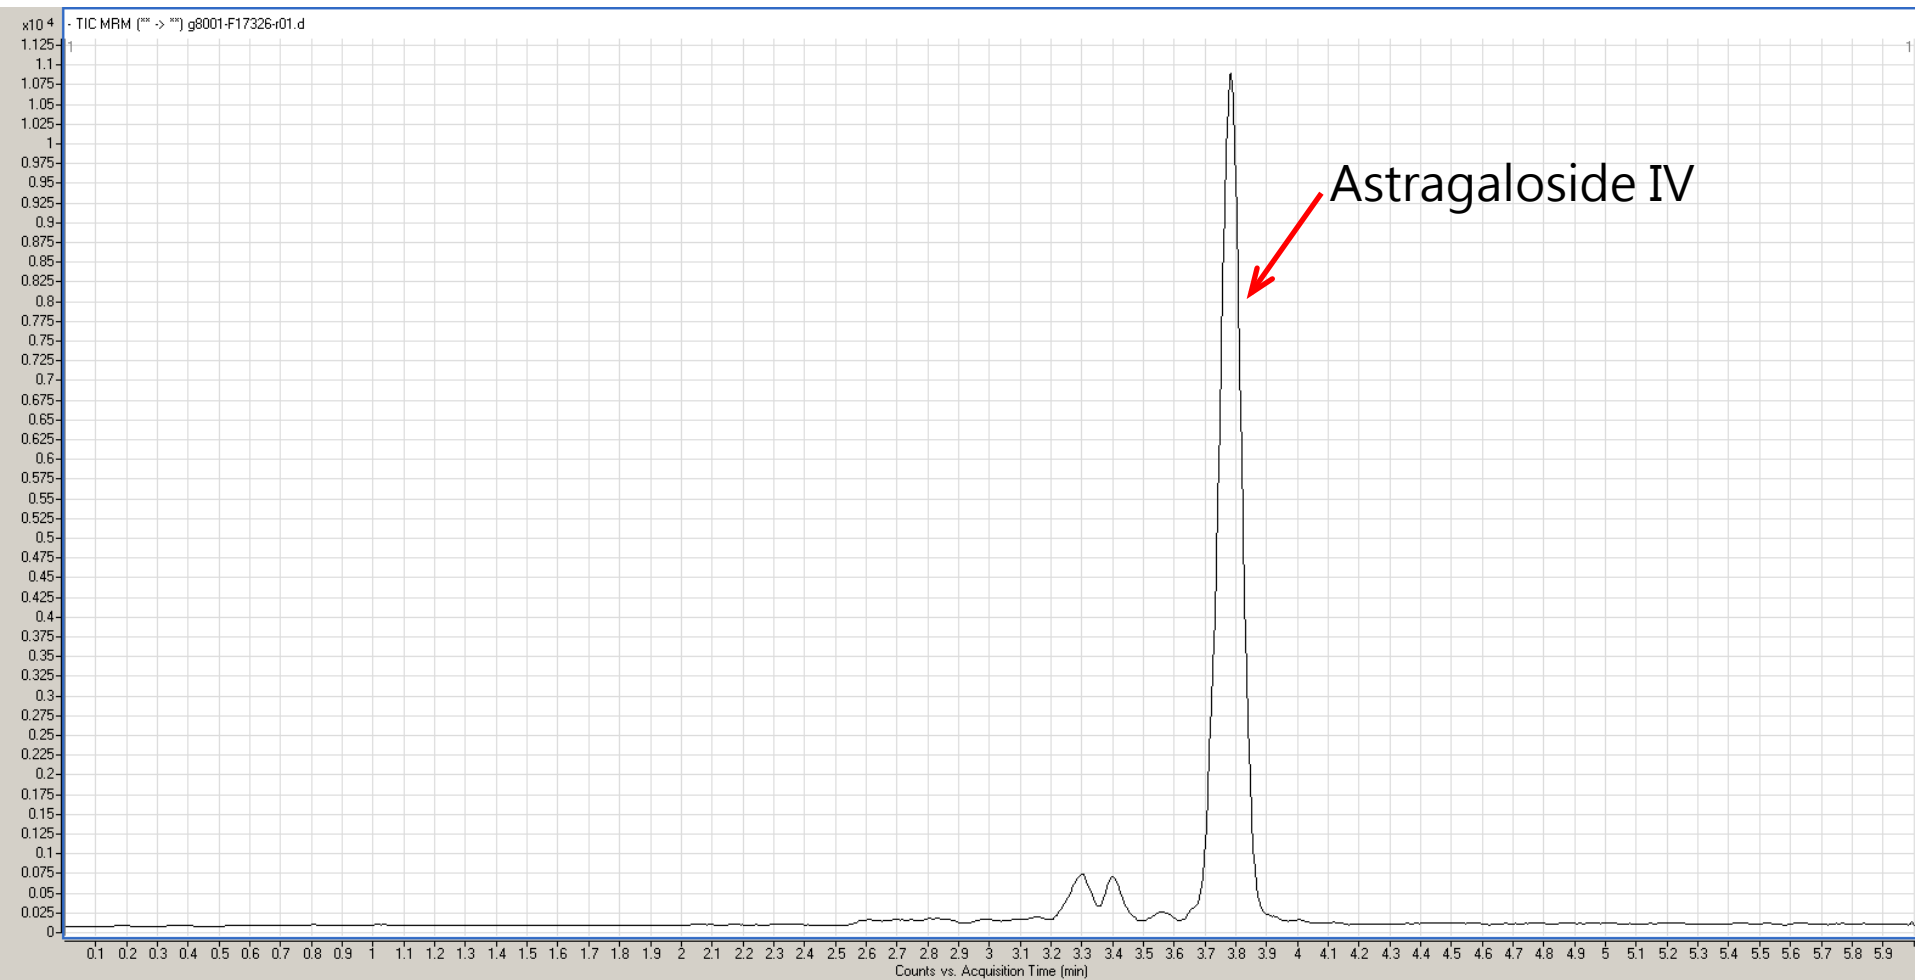

Supplement: MOESM1 [file 14213264]
